# Supplementary material for: On the Effect of the Co-Introduction of Al and Ga Impurities on the Electrical Performance of Transparent Conductive ZnO-Based Thin Films
Source: MDPI journal article supplement (doi:10.3390/ma15175862), 2022-08-25
Supplement: s1 [file s1]

# On the Effect of the Co-Introduction of Al and Ga Impurities on the Electrical Performance of Transparent Conductive ZnO-Based Thin Films

Abil S. Asvarov <sup>1,2,\*</sup>, Aslan K. Abduev <sup>3</sup>, Akhmed K. Akhmedov <sup>1</sup> and Vladimir M. Kanevsky <sup>2</sup>

<sup>1</sup> Institute of Physics, Dagestan Research Center of Russian Academy Sciences, Yaragskogo Str., 94, 367015 Makhachkala, Russia

<sup>2</sup> Shubnikov Institute of Crystallography, Federal Scientific Research Center “Crystallography and Photonics” of Russian Academy of Sciences, Leninsky Prospect, 59, 119333 Moscow, Russia

<sup>3</sup> Basic Department of Nanotechnology and Microsystem Technology, Academy of Engineering, RUDN University, 117198 Moscow, Russia

\* Correspondence: abil-as@list.ru

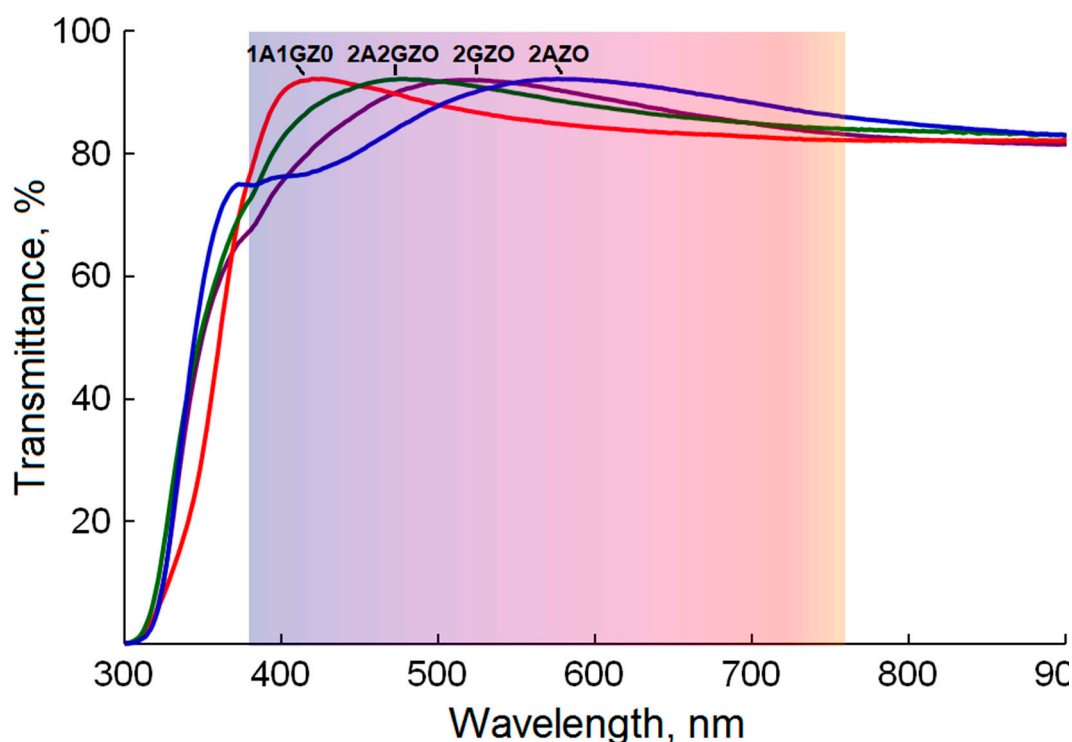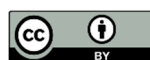

**Copyright:** © 2022 by the authors. Licensee MDPI, Basel, Switzerland. This article is an open access article distributed under the terms and conditions of the Creative Commons Attribution (CC BY) license (<https://creativecommons.org/licenses/by/4.0/>).

**Figure S1.** Transmittance spectra of glasses covered at 300°C by single-doped (2AZO, 2GZO) and co-doped (1A1GZO, 2A2GZO) thin films.

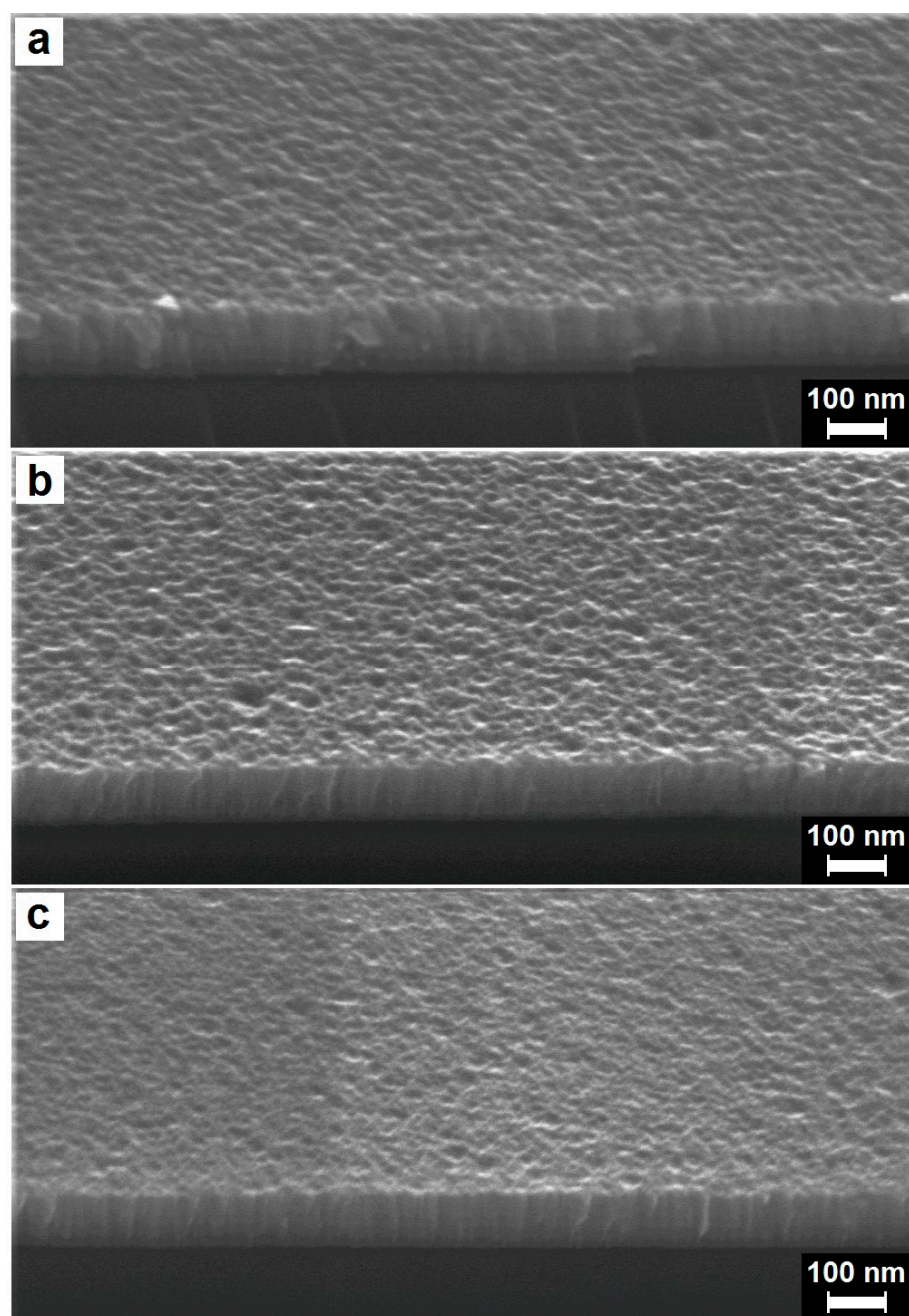

**Figure S2.** SEM micrographs of 2AZO (a), 2GZO (b), and 2A2GZO (c) thin films deposited at substrate temperature of 300°C.
